# Supplementary material for: Identification and expression of cuticular protein genes based on Locusta migratoria transcriptome
Source: PubMed Central journal article supplement (PMC5377371; doi:10.1038/srep45462), 2017-04-03
Supplement: srep45462-s1.pdf [file srep45462-s1.pdf]

## **Identification and expression of cuticular protein genes based on *Locusta migratoria* transcriptome**

Xiaoming Zhao<sup>1#</sup>, Xin Gou<sup>1,2#</sup>, Zhongyu Qin<sup>1,2</sup>, Daqi Li<sup>1</sup>, Yan Wang<sup>1,2</sup>, Enbo Ma<sup>1</sup>, Sheng Li<sup>3</sup> and Jianzhen Zhang<sup>1\*</sup>

<sup>1</sup>Research Institute of Applied Biology, Shanxi University, Taiyuan, Shanxi 030006, China

<sup>2</sup>College of Life Science, Shanxi University, Taiyuan, Shanxi 030006, China

<sup>3</sup>Guangzhou Key Laboratory of Insect Development Regulation and Application Research, Institute of Insect Sciences and School of Life Sciences, South China Normal University, Guangzhou 510631, China

### **Supplementary legends**

**Figure S1 Output statistics of sequencing, statistics of assembly quality and length distribution of Unigene**

**Figure S2. Gene ontology (GO) assignment for the *L. migratoria* transcriptome.** The GO classification map was done by uploading the GO ID numbers of genes for their involvement in biological processes, cellular components, and molecular functions. The number of Unigenes assigned to each GO term is shown in the right column.

**Figure S3. Clusters of orthologous groups (COG) classification of *L. migratoria* Unigenes.** A total of 9,160 produced functional annotations were among the 25 categories. The Y-axis shows the number of unigene in each COG term.

Figure S1

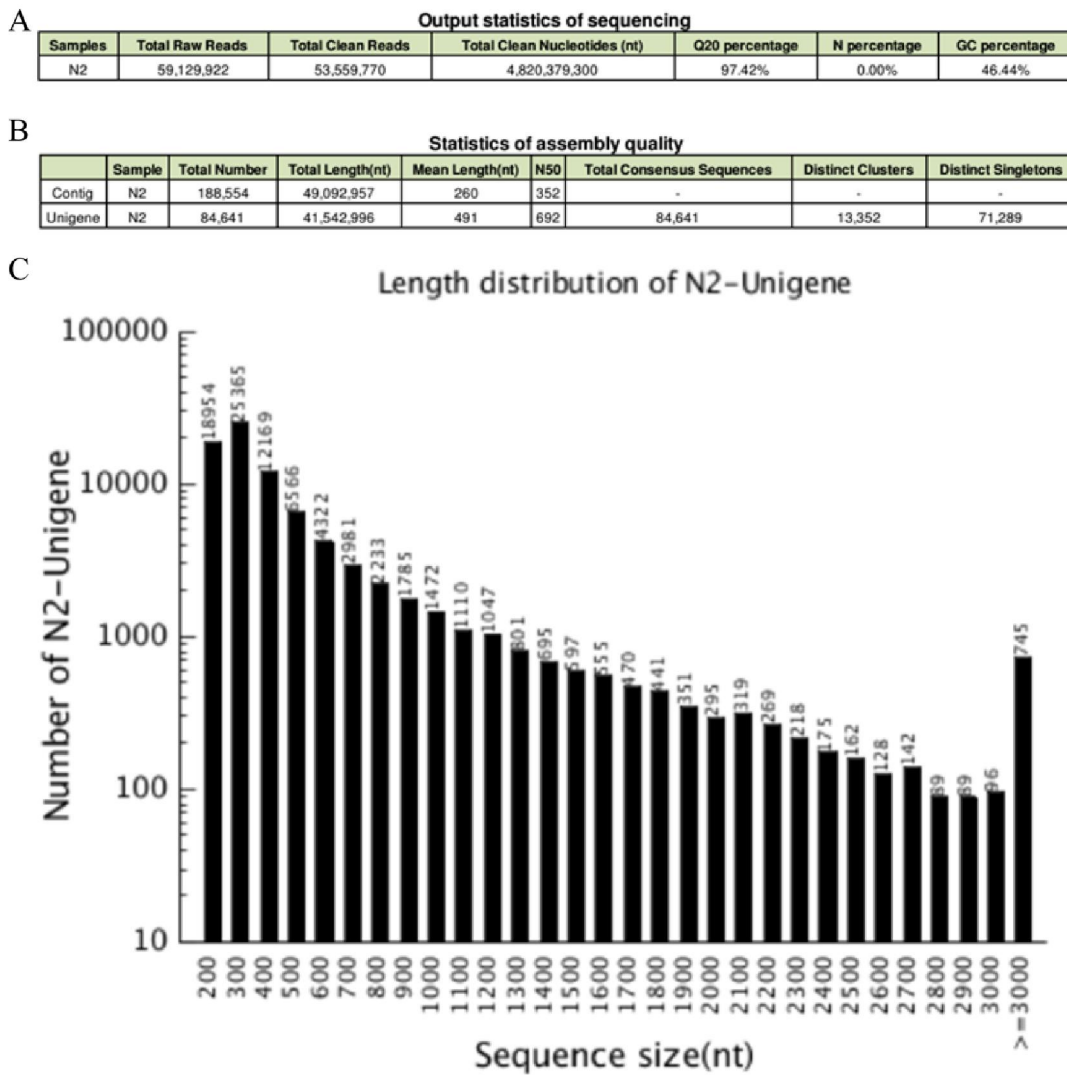



**Figure S3**

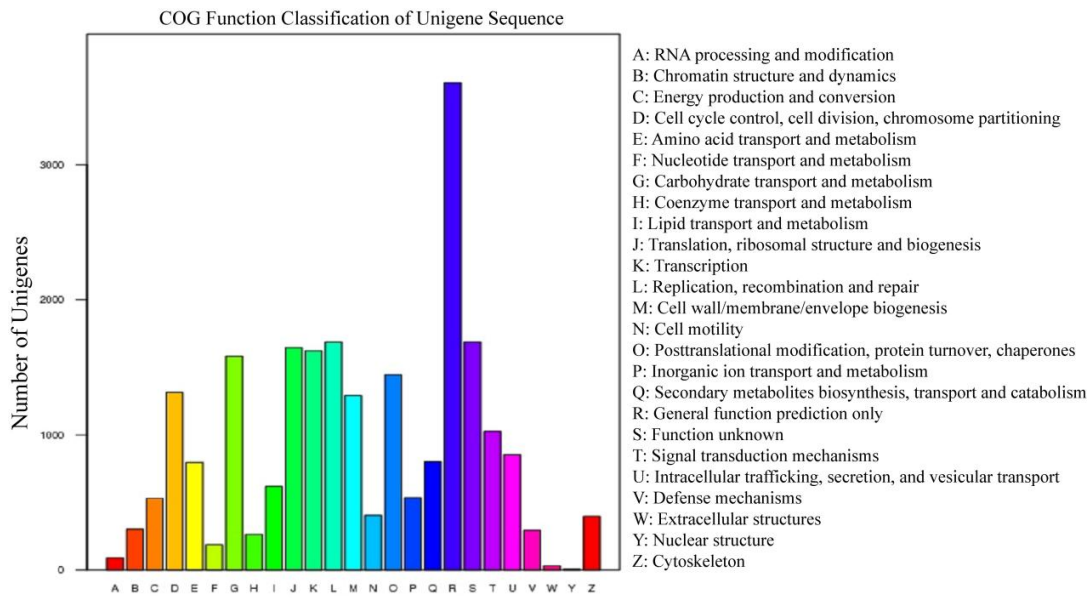

Fig.S4-1

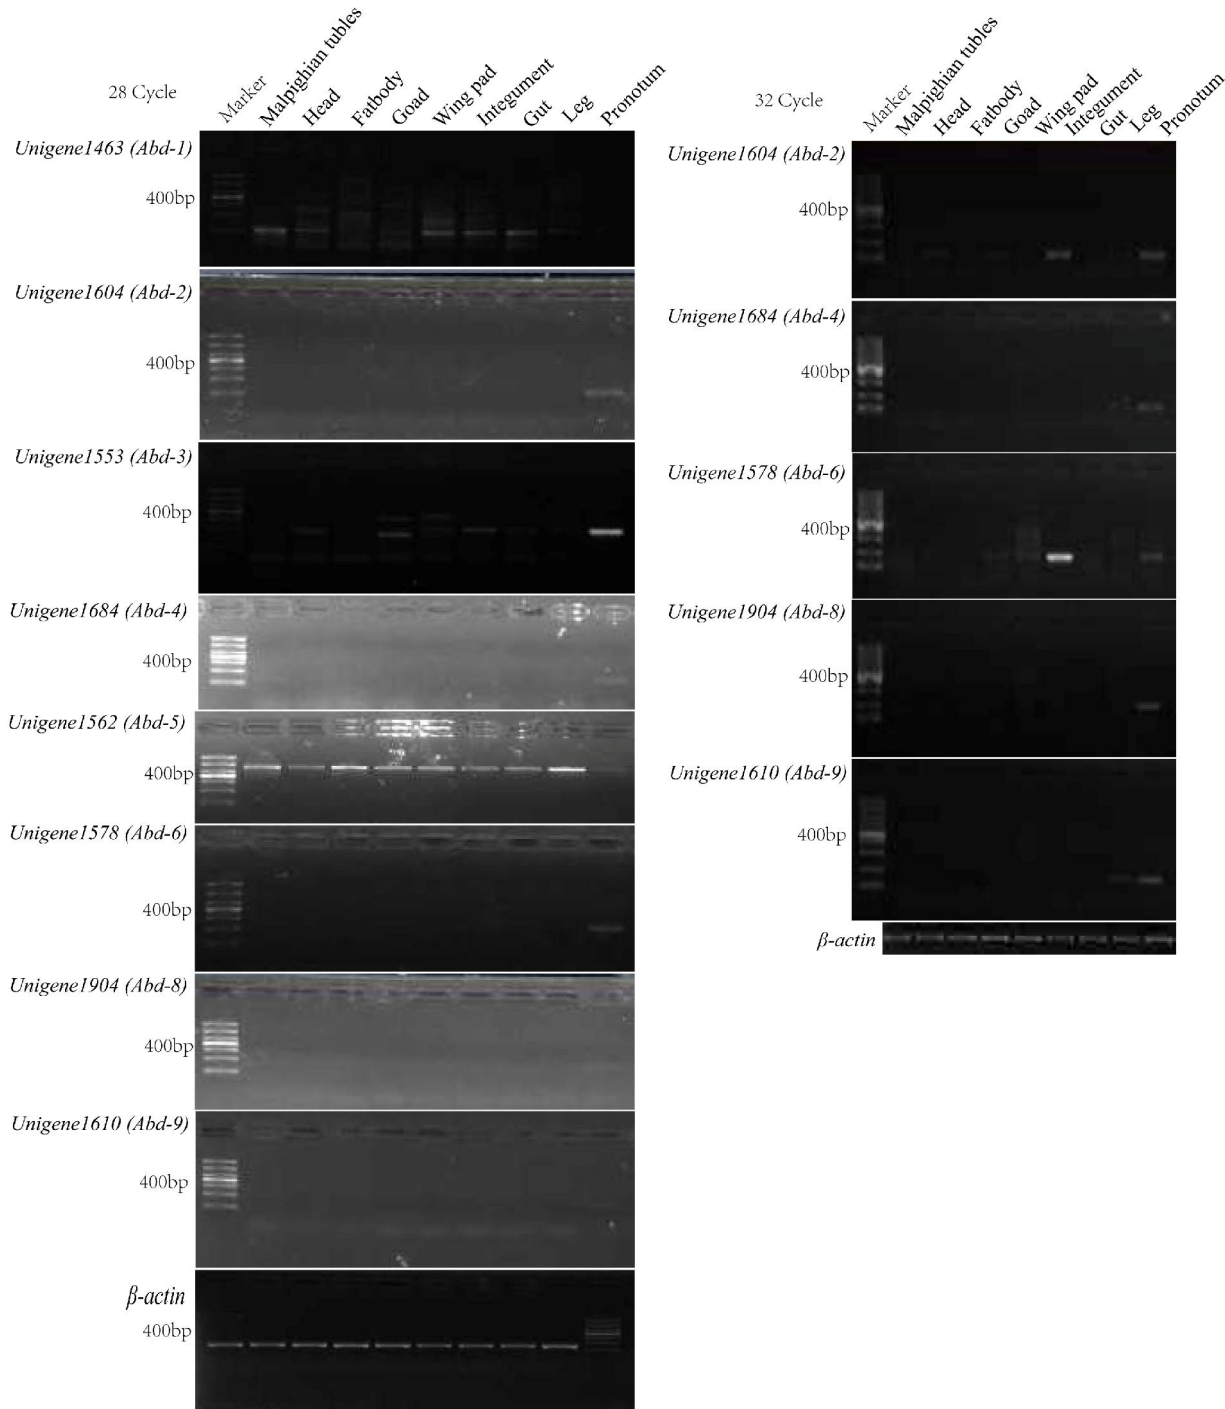



Fig.S4-3

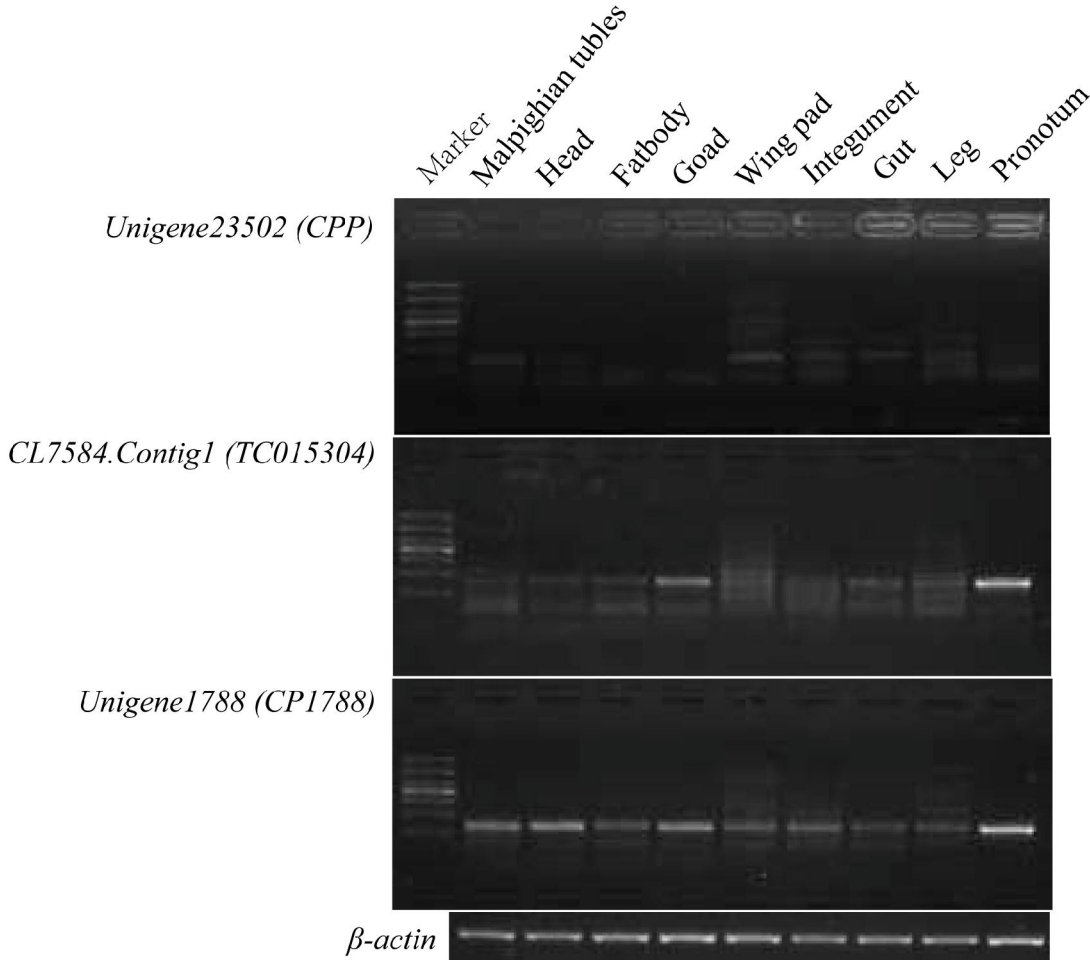





Fig.S6

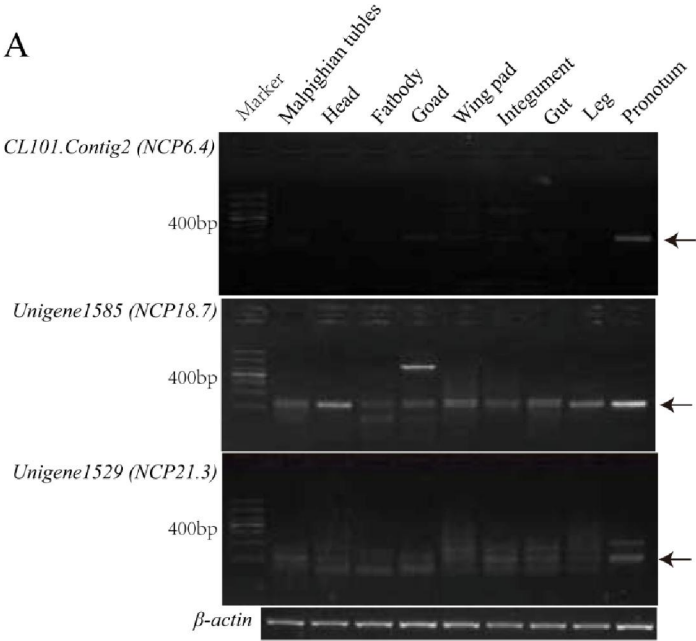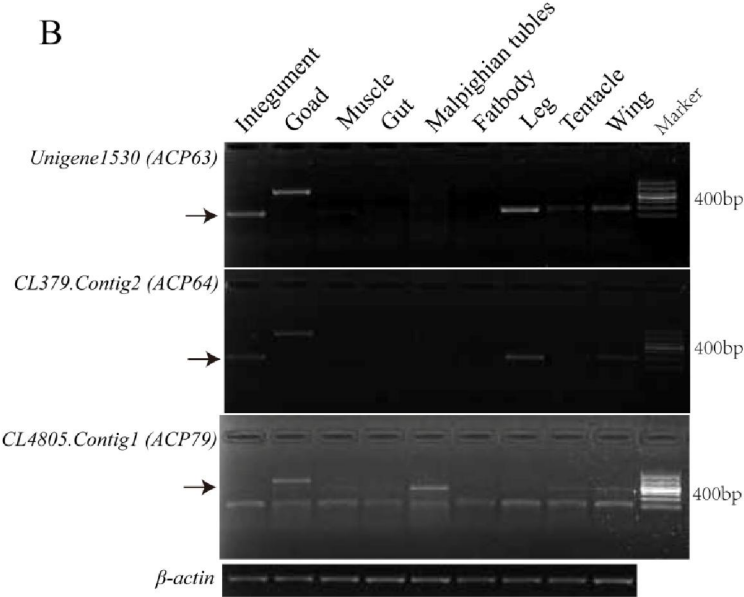

Table S1: Name of gene and accession number for phylogenetic analysis from NCBI

| Homologous gene  | Insects                        | Accession number |
|------------------|--------------------------------|------------------|
| <i>LmObst-A1</i> | <i>Locusta migratoria</i>      | KM099158         |
| <i>LmObst-A2</i> | <i>Locusta migratoria</i>      | KM099161         |
| <i>LmObst-B</i>  | <i>Locusta migratoria</i>      | KM099159         |
| <i>LmObst-C</i>  | <i>Locusta migratoria</i>      | KM099160         |
| <i>LmObst-D1</i> | <i>Locusta migratoria</i>      | KM099162         |
| <i>LmObst-D2</i> | <i>Locusta migratoria</i>      | KM099163         |
| <i>LmObst-E</i>  | <i>Locusta migratoria</i>      | KM099164         |
| <i>LmObst-F</i>  | <i>Locusta migratoria</i>      | KX503043         |
| <i>LmObst-H</i>  | <i>Locusta migratoria</i>      | KX503044         |
| <i>DmObst-A1</i> | <i>Drosophila melanogaster</i> | NP_608378.2      |
| <i>TcObst-A1</i> | <i>Tribolium castaneum</i>     | NP_001161910.1   |
| <i>TcObst-A2</i> | <i>Tribolium castaneum</i>     | NP_001161909.1   |
| <i>DmObst-B</i>  | <i>Drosophila melanogaster</i> | NP_609339.1      |
| <i>TcObst-B</i>  | <i>Tribolium castaneum</i>     | NP_001073566.1   |
| <i>DmObst-C1</i> | <i>Drosophila melanogaster</i> | NP_649611.2      |
| <i>DmObst-C2</i> | <i>Drosophila melanogaster</i> | NP_001097694.1   |
| <i>TcObst-C1</i> | <i>Tribolium castaneum</i>     | NP_001073569.1   |
| <i>TcObst-C2</i> | <i>Tribolium castaneum</i>     | NP_001107778.1   |
| <i>DmObst-D</i>  | <i>Drosophila melanogaster</i> | NP_523418.1      |
| <i>TcObst-D1</i> | <i>Tribolium castaneum</i>     | NP_001161908.1   |
| <i>TcObst-D2</i> | <i>Tribolium castaneum</i>     | NP_001073568.1   |
| <i>TcObst-E</i>  | <i>Tribolium castaneum</i>     | NP_001161915.1   |
| <i>DmObst-E1</i> | <i>Drosophila melanogaster</i> | NP_608957.1      |
| <i>DmObst-E2</i> | <i>Drosophila melanogaster</i> | NP_723116.1      |
| <i>TcObst-F</i>  | <i>Tribolium castaneum</i>     | NP_001161917.1   |
| <i>TcObst-H</i>  | <i>Tribolium castaneum</i>     | NP_001161918.1   |
| <i>Twedde1</i>   | <i>Apis mellifera</i>          | ACJ38118         |
| <i>Twedde1</i>   | <i>Nasonia vitripennis</i>     | NP_001136080     |
| <i>Twedde2</i>   | <i>Apis mellifera</i>          | ADK73965         |
| <i>Twedde2</i>   | <i>Nasonia vitripennis</i>     | NP_001166856     |
| <i>Twedde2</i>   | <i>Bombyx mori</i>             | NP_001036950     |
| <i>Twedde3</i>   | <i>Bombyx mori</i>             | NP_001036951     |
| <i>Twedde4</i>   | <i>Bombyx mori</i>             | NP_001166627     |

Table S2 Primer sequences used in this study

| Gene             | Primer sequences (5'-3')    | Assay              |
|------------------|-----------------------------|--------------------|
| <i>Abd1</i>      | F: TCCAGCGGTAGGAGCCGTCGTT   | RT-PCR and RT-qPCR |
|                  | R: AGCCCGCCATCGTGCCAGTT     |                    |
| <i>Abd2</i>      | F: GTGTTTGACCCTGCTGGTG      | RT-PCR and RT-qPCR |
|                  | R: CCGTTGCCGTTTCGTATT       |                    |
| <i>Abd3</i>      | F: CCGTTCTCGTCGGCGGTGTA     | RT-PCR and RT-qPCR |
|                  | R: ACGTCAACTTCGATGGCTCCT    |                    |
| <i>Abd4</i>      | F: CGCACTTCCCGACTCCAC       | RT-PCR and RT-qPCR |
|                  | R: CGGGGCTCTGCCTTATCG       |                    |
| <i>Abd5</i>      | F: AGTCCTAAGCGCCCAACAATG    | RT-PCR and RT-qPCR |
|                  | R: GGCAAATAACTTCACAAAAT     |                    |
| <i>Abd6</i>      | F: GACGGCAAGGACTACAGCA      | RT-PCR and RT-qPCR |
|                  | R: TCGAGTGAGGAGGGAGGAA      |                    |
| <i>Abd8</i>      | F: AGCAGCCGGGCAACAACC       | RT-PCR and RT-qPCR |
|                  | R: CGTCACATCAGCAACAGCGAAG   |                    |
| <i>Abd9</i>      | F: AGGACCTCAGCACCCCAACC     | RT-PCR and RT-qPCR |
|                  | R: CGGGACAAGCCCAAAAGAGT     |                    |
| <i>ACP7</i>      | F: CAGTCAGCTGCGTCCACCTC     | RT-PCR and RT-qPCR |
|                  | R: GGC GCGCGGACGGCCACCA     |                    |
| <i>ACP8</i>      | F: GAAGGTACGGCAACCTGGGA     | RT-qPCR            |
|                  | R: GGGGGCGGCCACGTGGGCGA     |                    |
| <i>ACP8</i>      | F: GGGGGCTACGCCCCCCCGC      | RT-PCR             |
|                  | R: GTGGTAGGCGATGGGCGCATG    |                    |
| <i>ACP19</i>     | F: TCCACCGACGAGCAGACCAG     | RT-PCR and RT-qPCR |
|                  | R: TTGACGACGGCGGGAGCAGC     |                    |
| <i>ACP20</i>     | F: CGTATGGCGTGACGGACC       | RT-PCR and RT-qPCR |
|                  | R: GCTGACGACGGCGTTGAA       |                    |
| <i>ACP21</i>     | F: GCCGTGGCTGCCGAGTAT       | RT-PCR and RT-qPCR |
|                  | R: GGTCTCCTGCTGGGTCTTG      |                    |
| <i>cyp</i>       | F: GGGCAGCTATCGCCAAGCA      | RT-PCR and RT-qPCR |
|                  | R: ACGCGGAAGCCGTTCAAGTC     |                    |
| <i>TC014498</i>  | F: CAAGGCTCTGAGGACGAAG      | RT-PCR and RT-qPCR |
|                  | R: TCACCCTGTGGCTGGAAT       |                    |
| <i>CP1788</i>    | F: GTCGGCGGCTACTCTACGT      | RT-PCR and RT-qPCR |
|                  | R: TGGATGCGGTGGATGACTT      |                    |
| <i>LmObst-A1</i> | F: GCTGCTCAGTCGGAGAGGTCTA   | RT-qPCR            |
|                  | R: AGTCCTCACATCCTGGCACG     |                    |
| <i>LmObst-A2</i> | F: GTCACCTTCAAGTGCGACGA     | RT-qPCR            |
|                  | R: CCTCTTGCCCTTCATCAGCGT    |                    |
| <i>LmObst-B</i>  | F: AGGAACTACTCGTCCCACG      | RT-qPCR            |
|                  | R: GAGGCGAGTAAGTCTGTAACACGT |                    |
| <i>LmObst-C</i>  | F: ATCGGAGACTCCGACGGCT      | RT-qPCR            |
|                  | R: TCGCTCTTGCGGATGCTCT      |                    |

---

|                                 |                                                          |                    |
|---------------------------------|----------------------------------------------------------|--------------------|
| <i>LmObst-D1</i>                | F: GAAATAAGCCAACCATCTGC<br>R: CTGTCAGGACTTTACATACACAATT  | RT-qPCR            |
| <i>LmObst-D2</i>                | F: CTGGGCAAGTCGTGCAACC<br>R: GACGGTCGAACACCAGCATG        | RT-qPCR            |
| <i>LmObst-E</i>                 | F: GAGATGTGCTGATGGCTACGC<br>R: GCAGGCTTCAGTCGGAGATTAG    | RT-qPCR            |
| <i>LmObst-F</i>                 | F: AGTATGGCACTGGTGTCTC<br>R: TTCCGTCTTTGTCCTTGAT         | RT-qPCR            |
| <i>LmObst-H</i>                 | F: TATCATCATTGCCTCTTTG<br>R: ACAGGGCTTCATTCTTTT          | RT-qPCR            |
| <i>Tweedle1</i>                 | F: TTCATCCGCTACAAGACCCAGA<br>R: CCTCCGAGACCGTCACCG       | RT-PCR and RT-qPCR |
| <i>Tweedle2</i>                 | F: CGTGGTGCCAGCGTGTA<br>R: ACGGCAGGGGTGTCCAGT            | RT-PCR and RT-qPCR |
| <i>NCP6.4</i>                   | F: GGATACTATGGCTACGGC<br>R: CGATTATGTTTACAGAGGC          | RT-PCR and RT-qPCR |
| <i>NCP18.7</i>                  | F: CGTGGTGCCAGCGTGTA<br>R: ACGGCAGGGGTGTCCAGT            | RT-PCR and RT-qPCR |
| <i>NCP21.3</i>                  | F: TACACCAACACCGCCGACTT<br>R: CACCGCCTTGAGAACTGC         | RT-PCR and RT-qPCR |
| <i>ACP63</i>                    | F: ACGGACACGGTCTGGGATA<br>R: CGAGGGTGAAGCGTAGTTT         | RT-PCR             |
| <i>ACP64</i>                    | F: TCAGTGATGGGTGATGCG<br>R: CGGACACGGTCTGGGATA           | RT-PCR             |
| <i>ACP79</i>                    | F: CGGCTTGGGTCTCGGCGGCTAC<br>R: GCGGCTGCGATGCCAATG       | RT-PCR             |
| <i><math>\beta</math>-actin</i> | F: CGAAGCACAGTCAAAGAGAGGTA<br>R: GCTTCAGTCAAGAGAACAGGATG | RT-PCR and RT-qPCR |

---

Table S3 Statistics of annotation results

| Annotation | Numbers |
|------------|---------|
| NR         | 26696   |
| NT         | 12130   |
| Swissport  | 21327   |
| KEGG       | 18674   |
| COG        | 9160    |
| GO         | 13304   |
| All        | 29289   |

Table S4 Summary of the identified cuticle proteins in *L.migratoria*

| Unigenes ID     | Family | ChtBD | Gene description                                  |
|-----------------|--------|-------|---------------------------------------------------|
| Unigene1463     | RR-1   | Y     | Endocuticle structural glycoprotein (Abd-1)       |
| Unigene1604     | RR-1   | Y     | Endocuticle structural glycoprotein (Abd-2)       |
| Unigene1553     | RR-1   | Y     | Endocuticle structural glycoprotein (Abd-3)       |
| Unigene1684     | RR-1   | Y     | Endocuticle structural glycoprotein (Abd-4)       |
| Unigene1562     | RR-1   | Y     | Endocuticle structural glycoprotein (Abd-5)       |
| Unigene1578     | RR-1   | Y     | Endocuticle structural glycoprotein (Abd-6)       |
| Unigene1904     | RR-1   | Y     | Endocuticle structural glycoprotein (Abd-8)       |
| Unigene1610     | RR-1   | Y     | Endocuticle structural glycoprotein (Abd-9)       |
| CL694.Contig1   | RR-1   | Y     | early cuticle protein 2                           |
| CL694.Contig2   | RR-1   | Y     | early cuticle protein 3                           |
| CL5853.Contig1  | RR-1   | Y     | early cuticle protein 4                           |
| Unigene1033     | RR-1   | Y     | putative cuticle protein CP5                      |
| Unigene1514     | RR-1   | Y     | early cuticle protein 6                           |
| Unigene9827     | RR-1   | Y     | larval cuticle protein 8                          |
| CL6188.Contig1  | RR-1   | Y     | flexible cuticle protein 12-like                  |
| Unigene4267     | RR-1   | Y     | cuticle protein 2                                 |
| Unigene12826    | RR-1   | Y     | Flexible cuticle protein 12                       |
| Unigene1613     | RR-1   | Y     | larval cuticle protein 12.3                       |
| CL2845.Contig1  | RR-1   | Y     | hypothetical protein YQE_08581                    |
| Unigene4928     | RR-1   | Y     | AAEL013514-PA                                     |
| Unigene1567     | RR-1   | Y     | hypothetical protein TcasGA2_TC014498             |
| CL3709.Contig6  | RR-1   | Y     | larval cuticle protein LCP-17-like precursor      |
| CL4965.Contig1  | RR-1   | Y     | cuticular protein RR-1 motif 27 precursor         |
| CL1330.Contig11 | RR-1   | Y     | Cpr49Aa, partial                                  |
| Unigene1513     | RR-1   | Y     | cuticular protein RR-1 family member 53 precursor |
| Unigene3071     | RR-2   | Y     | Adult cuticle protein 7 (ACP7)                    |
| CL7107.Contig2  | RR-2   | Y     | Adult cuticle protein 8 (ACP8)                    |
| CL1285.Contig1  | RR-2   | Y     | cuticle protein 7-like                            |

|                |          |   |                                            |
|----------------|----------|---|--------------------------------------------|
| Unigene1528    | RR-2     | Y | cuticle protein 18.6, isoform A-like       |
| Unigene14515   | RR-2     | Y | cuticle protein 18.6, isoform B-like       |
| Unigene3791    | RR-2     | Y | Adult cuticle protein 19 (ACP19)           |
| CL2086.Contig2 | RR-2     | Y | Nymph cuticle protein 19.8 (NCP19.8)       |
| Unigene13961   | RR-2     | Y | adult-specific cuticular protein ACP20     |
| Unigene435     | RR-2     | Y | Adult cuticle protein 21 (ACP21)           |
| CL5595.Contig1 | RR-2     | Y | adult-specific cuticular protein ACP22     |
| Unigene5041    | RR-2     | Y | structural constituent of cuticle          |
| CL7266.Contig2 | RR-2     | Y | Larval cuticle protein A3A                 |
| CL7266.Contig1 | RR-2     | Y | larval cuticle protein A2B-like            |
| Unigene5040    | RR-2     | Y | cuticular protein 116, RR-2 family         |
| Unigene3748    | RR-2     | Y | pro-resilin-like                           |
| Unigene486     | RR-2     | Y | Pro-resilin                                |
| Unigene1846    | RR-2     | Y | Pupal cuticle protein Edg-84A-like Protein |
| CL1363.Contig1 | RR-2     | Y | GH17178                                    |
| CL4063.Contig1 | RR-3     | Y | Cuticle protein 6                          |
| Unigene2600    | RR-3     | Y | NCP14.9                                    |
| Unigene3881    | RR-3     | Y | cuticular protein 3                        |
| Unigene23502   | RR-3     | Y | cuticular protein precursor                |
| Unigene1788    | RR-3     | Y | cuticle protein, putative                  |
| Unigene1801    | RR-3     | Y | Pupal cuticle protein Edg-78E              |
| Unigene3319    | RR-3     | Y | hypothetical protein YQE_02146             |
| CL7584.Contig1 | RR-3     | Y | hypothetical protein TcasGA2_TC015304      |
| Unigene1893    | CPAP3    | Y | LmObst-A1                                  |
| Unigene1946    | CPAP3    | Y | LmObst-A2                                  |
| Unigene2346    | CPAP3    | Y | LmObst-B                                   |
| Unigene4275    | CPAP3    | Y | LmObst-C                                   |
| Unigene1772    | CPAP3    | Y | LmObst-D1                                  |
| Unigene2115    | CPAP3    | Y | LmObst-D2                                  |
| Unigene4514    | CPAP3    | Y | LmObst-E1                                  |
| Unigene3887    | CPAP1    | Y | LmObst-H                                   |
| Unigene25974   | CPAP1    | Y | LmObst-F                                   |
| CL6568.Contig1 | Tweedle  | Y | Tweedle 1                                  |
| Unigene48534   | Tweedle  | Y | Tweedle 2                                  |
| Unigene1519    | CPF&CPFL | N | CPF1 (NCP4.9)                              |
| Unigene16603   | CPF&CPFL | N | CPF2 (ACP38)                               |
| Unigene1530    | CPF&CPFL | N | CPF3 (ACP63)                               |
| CL379.Contig2  | CPF&CPFL | N | CPF4 (ACP64)                               |
| Unigene1529    | CPF&CPFL | N | CPF5 (NCP21.3)                             |
| CL101.Contig2  | CPF&CPFL | N | CPFL1 (NCP6.4)                             |
| Unigene3699    | CPF&CPFL | N | CPFL2 (NCP1)                               |

|                |          |   |                                 |
|----------------|----------|---|---------------------------------|
| Unigene4714    | CPF&CPFL | N | CPFL3 (ACP76)                   |
| CL4805.Contig1 | CPF&CPFL | N | CPFL4 (ACP79)                   |
| Unigene496     | Others   | N | NCP9.5                          |
| Unigene1585    | Others   | N | NCP18.7                         |
| Unigene385     | Others   | N | NCP62                           |
| Unigene1724    | Others   | N | ACP16.5A                        |
| Unigene9168    | Others   | N | NCP3                            |
| Unigene1658    | Others   | N | proline-rich protein 4          |
| CL1285.Contig4 | Others   | N | Cuticle protein 4               |
| Unigene14788   | Others   | Y | neoplasm 1-like                 |
| Unigene3087    | Others   | Y | hypothetical protein BE21_11430 |
| Unigene1647    | Others   | Y | cuticular protein 78            |
